# Supplementary material
Source: HighWire-hosted journal article supplement (https://www.jneurosci.org/content/42/33/6424)
Supplement: media-3 [file media-3.docx]

**Table 2-3. Gist source memory analysis including fixed-effect of confidence level (definitely old or maybe old)**

**
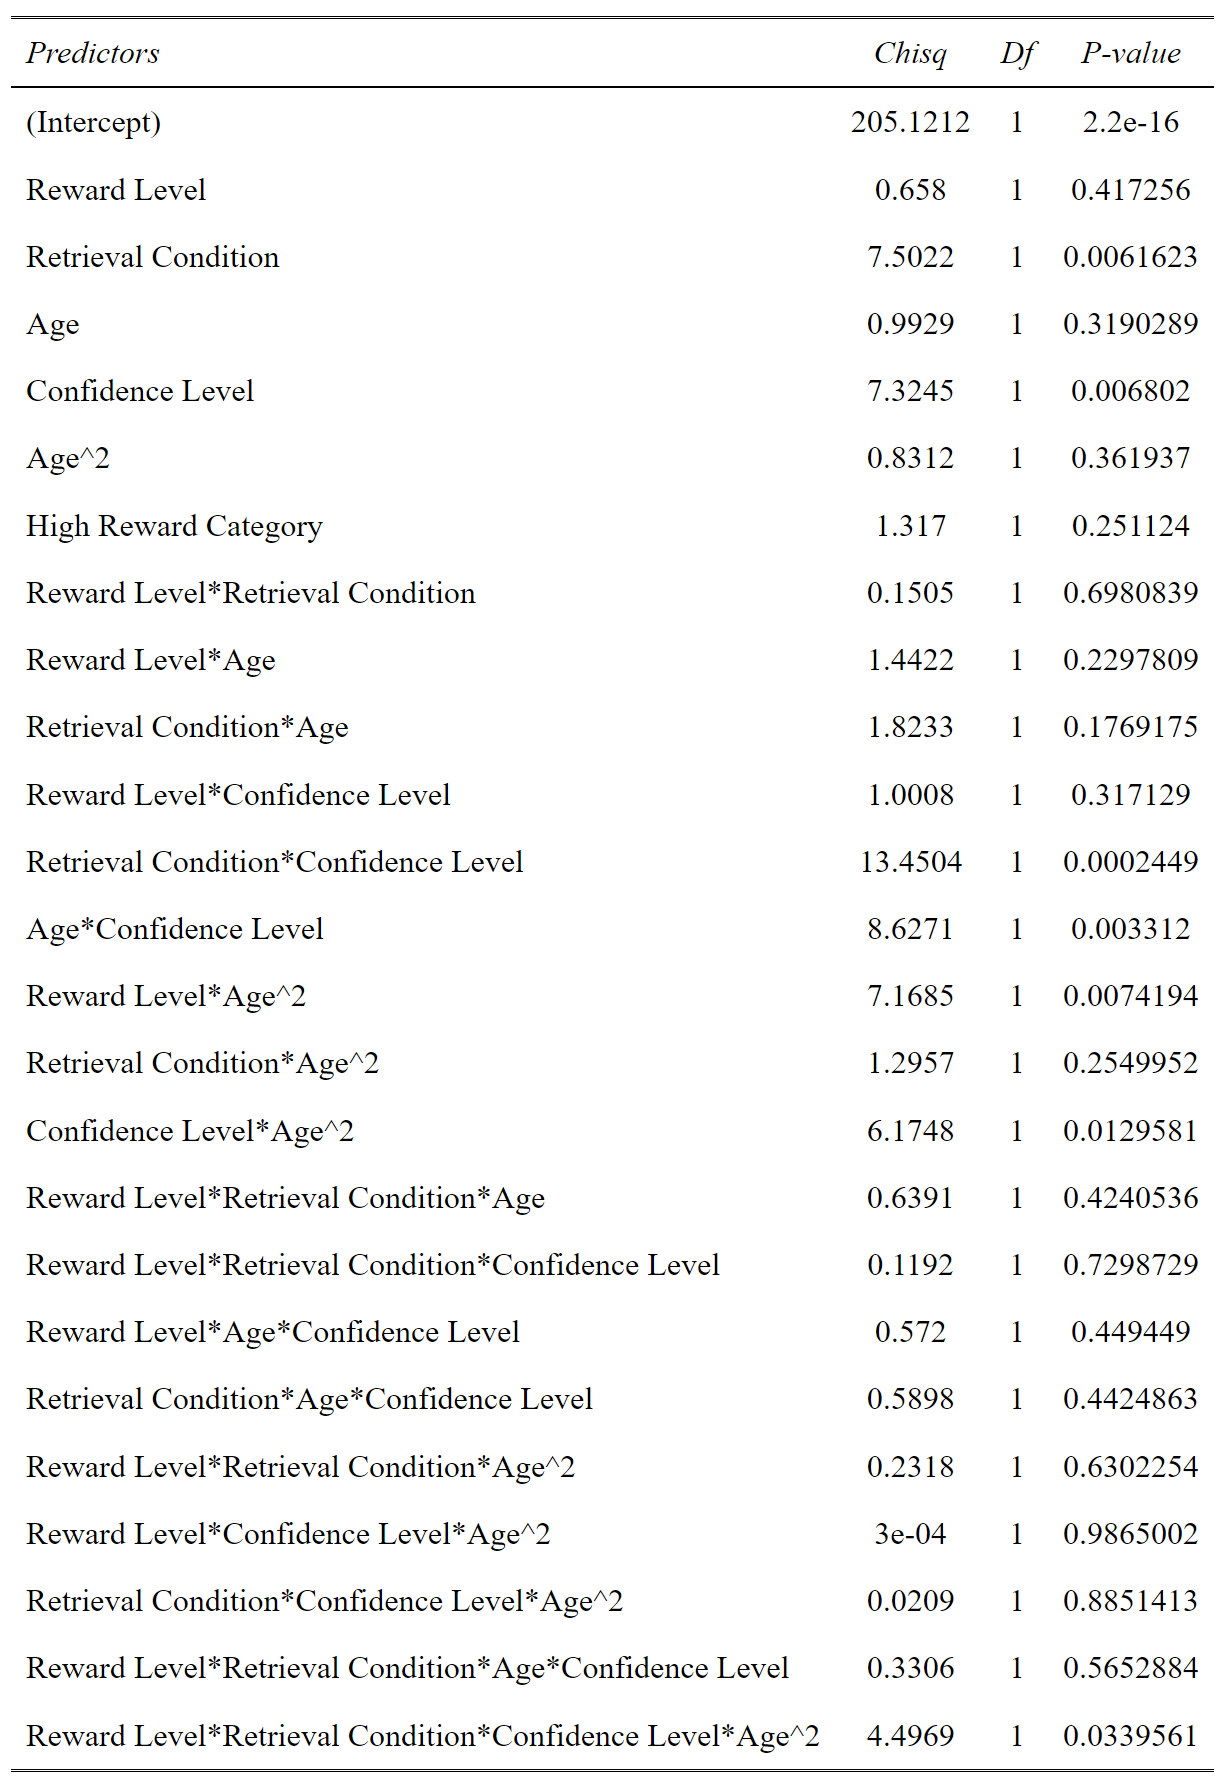
**
