# Supplementary material
Source: HighWire-hosted journal article supplement (https://www.jneurosci.org/content/42/33/6424)

**Table 3-5. dlPFC-high reward gist source memory benefit regression table**

**
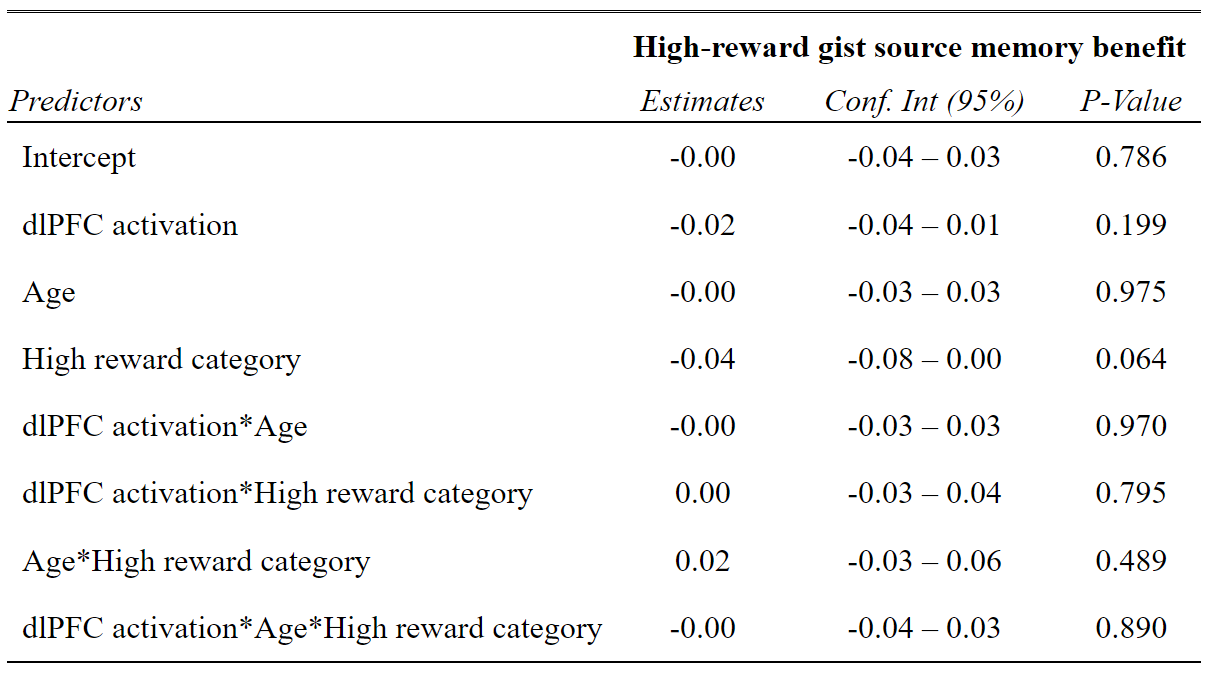
**

Supplement: media-10 [file media-10.docx]
